# Supplementary material
Source: PubMed Central journal article supplement (PMC5398764)
Supplement: NIHMS858725-supplement-Supp_data.pdf [file NIHMS858725-supplement-Supp_data.pdf]

1       **Systems analysis in *Cellvibrio japonicus* resolves predicted redundancy of  $\beta$ -**  
2       **glucosidases and determines essential physiological functions**

3  
4  
5  
6       Cassandra E. Nelson<sup>a</sup>, Artur Rogowski<sup>b</sup>, Carl Morland<sup>b</sup>, Joshua A. Wilhide<sup>c</sup>, Harry J.  
7       Gilbert<sup>b</sup>, and Jeffrey G. Gardner<sup>a#</sup>

8  
9  
10  
11       **Keywords**

12        $\beta$ -glucosidase, cellodextrin, cellulose, *Cellvibrio japonicus*, functional redundancy

13  
14  
15  
16       **Running Title**

17       Functional analysis of *C. japonicus*  $\beta$ -glucosidases

18  
19  
20  
21       **Author Affiliations**

22       <sup>a</sup> Department of Biological Sciences, University of Maryland - Baltimore County,  
23       Baltimore, Maryland, USA

24  
25       <sup>b</sup> Institute for Cell and Molecular Biosciences, Newcastle University, Newcastle Upon  
26       Tyne, UK

27  
28       <sup>c</sup> Molecular Characterization and Analysis Complex, University of Maryland - Baltimore  
29       County, Maryland, USA

30  
31  
32  
33       **#Correspondence**

34       Jeffrey G. Gardner  
35       Department of Biological Sciences, 1000 Hilltop Circle, University of Maryland -  
36       Baltimore County, Baltimore, Maryland, USA 21250  
37       Phone: 410-455-3613  
38       Fax: 410-455-3875  
39       Email: jgardner@umbc.edu

40 **Table S1. Growth statistics of *C. japonicus* GH3 mutants grown in a defined**  
41 **cellobiose medium<sup>a</sup>**  
42

| Strain                                     | Growth Rate (gen hr <sup>-1</sup> ) | Lag Time (hrs) | Max OD <sub>600</sub> |
|--------------------------------------------|-------------------------------------|----------------|-----------------------|
| Wild Type <sup>b</sup>                     | 0.24±0.03                           | 3              | 1.08±0.039            |
| $\Delta cel3A^c$                           | 0.27±0.01                           | 3              | 1.06±0.016            |
| $\Delta cel3B^d$                           | 0.15±0.01                           | 4              | 0.99±0.002            |
| $\Delta cel3C^b$                           | 0.21±0.02                           | 3              | 1.07±0.023            |
| $\Delta cel3D^b$                           | 0.23±0.02                           | 3              | 1.06±0.011            |
| Wild Type <sup>e</sup>                     | 0.35±0.01                           | 5              | 1.02±0.015            |
| $\Delta cel3A \Delta cel3B^f$              | 0.09±0.01                           | 10             | 0.82±0.005            |
| $\Delta cel3A \Delta cel3C^g$              | 0.30±0.01                           | 5              | 0.99±0.005            |
| $\Delta cel3A \Delta cel3D^g$              | 0.29±0.01                           | 5              | 0.98±0.019            |
| $\Delta cel3B \Delta cel3C^h$              | 0.22±0.01                           | 7              | 1.05±0.005            |
| $\Delta cel3B \Delta cel3D^h$              | 0.17±0.02                           | 7              | 1.05±0.024            |
| $\Delta cel3C \Delta cel3D^g$              | 0.28±0.03                           | 5              | 1.05±0.012            |
| Wild Type <sup>i</sup>                     | 0.36±0.01                           | 2              | 1.05±0.002            |
| $\Delta cel3A \Delta cel3B \Delta cel3C^j$ | 0.24±0.03                           | 13             | 0.55±0.050            |
| $\Delta cel3A \Delta cel3B \Delta cel3D^k$ | 0.19±0.03                           | 10             | 0.85±0.036            |
| $\Delta cel3A \Delta cel3C \Delta cel3D^l$ | 0.22±0.01                           | 2              | 1.03±0.020            |
| $\Delta cel3B \Delta cel3C \Delta cel3D^m$ | 0.16±0.02                           | 5              | 0.97±0.005            |
| $\Delta 4\beta G^n$                        | 0.22±0.01                           | 13             | 0.52±0.028            |

43

44 <sup>a</sup> Experiments were performed in biological triplicate; average and standard deviation  
45 reported in Table

46 <sup>b</sup> Time points used to calculate growth rate were T<sub>i</sub>=4 and T<sub>f</sub>=12

47 <sup>c</sup> Time points used to calculate growth rate were T<sub>i</sub>=4 and T<sub>f</sub>=8

48 <sup>d</sup> Time points used to calculate growth rate were T<sub>i</sub>=10 and T<sub>f</sub>=14

49 <sup>e</sup> Time points used to calculate growth rate were T<sub>i</sub>=6 and T<sub>f</sub>=9

50 <sup>f</sup> Time points used to calculate growth rate were T<sub>i</sub>=12 and T<sub>f</sub>=19

51 <sup>g</sup> Time points used to calculate growth rate were T<sub>i</sub>=6 and T<sub>f</sub>=9

52 <sup>h</sup> Time points used to calculate growth rate were T<sub>i</sub>=7 and T<sub>f</sub>=11

53 <sup>i</sup> Time points used to calculate growth rate were T<sub>i</sub>=5 and T<sub>f</sub>=9

54 <sup>j</sup> Time points used to calculate growth rate were T<sub>i</sub>=18 and T<sub>f</sub>=22

55 <sup>k</sup> Time points used to calculate growth rate were T<sub>i</sub>=15 and T<sub>f</sub>=20

56 <sup>l</sup> Time points used to calculate growth rate were T<sub>i</sub>=5 and T<sub>f</sub>=9

57 <sup>m</sup> Time points used to calculate growth rate were T<sub>i</sub>=8 and T<sub>f</sub>=15

58 <sup>n</sup> Time points used to calculate growth rate were T<sub>i</sub>=18 and T<sub>f</sub>=23

59

60 **Table S2. Growth statistics of *C. japonicus* GH3 mutants grown in a defined**  
61 **insoluble cellulose medium<sup>a</sup>**  
62

| Strain                                     | Growth Rate (gen hr <sup>-1</sup> ) | Lag Time (hrs) | Max OD <sub>600</sub> |
|--------------------------------------------|-------------------------------------|----------------|-----------------------|
| Wild Type <sup>b</sup>                     | 0.16±0.01                           | 24             | 0.50±0.070            |
| $\Delta cel3A^c$                           | 0.17±0.02                           | 26             | 0.51±0.042            |
| $\Delta cel3B^d$                           | 0.08±0.02                           | 38             | 0.23±0.026            |
| $\Delta cel3C^e$                           | 0.16±0.02                           | 26             | 0.49±0.040            |
| $\Delta cel3D^d$                           | 0.16±0.02                           | 26             | 0.48±0.024            |
| Wild Type <sup>f</sup>                     | 0.18±0.001                          | 20             | 0.52±0.059            |
| $\Delta cel3A \Delta cel3B^g$              | 0.16±0.04                           | 52             | 0.52±0.039            |
| $\Delta cel3A \Delta cel3C^f$              | 0.16±0.02                           | 20             | 0.50±0.073            |
| $\Delta cel3A \Delta cel3D^f$              | 0.18±0.18                           | 20             | 0.50±0.073            |
| $\Delta cel3B \Delta cel3C^h$              | 0.06±0.004                          | 48             | 0.22±0.036            |
| $\Delta cel3B \Delta cel3D^h$              | 0.05±0.007                          | 48             | 0.20±0.007            |
| $\Delta cel3C \Delta cel3D^f$              | 0.22±0.03                           | 20             | 0.48±0.019            |
| Wild Type <sup>b</sup>                     | 0.17±0.01                           | 24             | 0.49±0.057            |
| $\Delta cel3A \Delta cel3B \Delta cel3C^i$ | 0.05±0.01                           | 52             | 0.12±0.025            |
| $\Delta cel3A \Delta cel3B \Delta cel3D^j$ | 0.04±0.002                          | 52             | 0.13±0.010            |
| $\Delta cel3A \Delta cel3C \Delta cel3D^k$ | 0.15±0.05                           | 28             | 0.48±0.020            |
| $\Delta cel3B \Delta cel3C \Delta cel3D^l$ | 0.09±0.01                           | 32             | 0.19±0.027            |
| $\Delta 4\beta G^m$                        | 0.06±0.01                           | 52             | 0.14±0.034            |

63  
64 <sup>a</sup> Experiments were performed in biological triplicate; average and standard deviation  
65 reported in Table

66 <sup>b</sup> Time points used to calculate growth rate were T<sub>i</sub>=24 and T<sub>f</sub>=38

67 <sup>c</sup> Time points used to calculate growth rate were T<sub>i</sub>=26 and T<sub>f</sub>=34

68 <sup>d</sup> Time points used to calculate growth rate were T<sub>i</sub>=38 and T<sub>f</sub>=48

69 <sup>e</sup> Time points used to calculate growth rate were T<sub>i</sub>=26 and T<sub>f</sub>=36

70 <sup>f</sup> Time points used to calculate growth rate were T<sub>i</sub>=20 and T<sub>f</sub>=32

71 <sup>g</sup> Time points used to calculate growth rate were T<sub>i</sub>=52 and T<sub>f</sub>=64

72 <sup>h</sup> Time points used to calculate growth rate were T<sub>i</sub>=48 and T<sub>f</sub>=72

73 <sup>i</sup> Time points used to calculate growth rate were T<sub>i</sub>=58 and T<sub>f</sub>=88

74 <sup>j</sup> Time points used to calculate growth rate were T<sub>i</sub>=64 and T<sub>f</sub>=78

75 <sup>k</sup> Time points used to calculate growth rate were T<sub>i</sub>=30 and T<sub>f</sub>=38

76 <sup>l</sup> Time points used to calculate growth rate were T<sub>i</sub>=38 and T<sub>f</sub>=56

77 <sup>m</sup> Time points used to calculate growth rate were T<sub>i</sub>=50 and T<sub>f</sub>=80

78

79 **Table S3. Genes up-regulated during exponential growth on cellobiose (compared**  
80 **to glucose) and growth statistics of the corresponding mutants when grown in a**  
81 **defined cellobiose medium<sup>a</sup>**  
82

| Gene          | Predicted Function <sup>b</sup>    | Fold Change <sup>c</sup> | Growth Rate (gen hr <sup>-1</sup> ) <sup>d</sup> | Maximum OD <sub>600</sub> <sup>e</sup> |
|---------------|------------------------------------|--------------------------|--------------------------------------------------|----------------------------------------|
| <i>adg97B</i> | α-glucosidase                      | 1.5                      | 0.23±0.01 <sup>k</sup>                           | 1.05±0.016                             |
| <i>aga27A</i> | α-glucosidase <sup>f</sup>         | 2.5                      | 0.24±0.01 <sup>k</sup>                           | 1.07±0.019                             |
| <i>amy13D</i> | α-amylase                          | 1.2                      | 0.24±0.004 <sup>l</sup>                          | 1.07±0.012                             |
| <i>axe2A</i>  | acetyl xylan esterase              | 3.3                      | 0.21±0.019 <sup>k</sup>                          | 1.09±0.004                             |
| <i>bgl35A</i> | β-galactosidase <sup>g</sup>       | 2.0                      | 0.20±0.003 <sup>k</sup>                          | 1.06±0.004                             |
| <i>cel3A</i>  | β-glucosidase <sup>n</sup>         | 1.5                      | 0.27±0.01 <sup>m</sup>                           | 1.04±0.007                             |
| <i>cel5C</i>  | cellulase                          | 2.3                      | 0.21±0.02 <sup>n</sup>                           | 1.08±0.013                             |
| <i>cel9B</i>  | cellulase                          | 1.3                      | 0.25±0.01 <sup>l</sup>                           | 1.08±0.010                             |
| <i>man26C</i> | endo-1, 4-β mannanase <sup>i</sup> | 1.3                      | 0.23±0.02 <sup>o</sup>                           | 1.07±0.025                             |
| <i>xy131A</i> | α-xylosidase <sup>j</sup>          | 2.3                      | 0.23±0.003 <sup>k</sup>                          | 1.08±0.010                             |

83

84 <sup>a</sup> RNAseq sampling experiments were performed in biological triplicate. Growth  
85 experiments were also performed in biological triplicate; average and standard deviation  
86 reported in Table

87 <sup>b</sup> predicted by DeBoy *et al.* (DeBoy *et al.*, 2008)

88 <sup>c</sup> log<sub>2</sub> scale in comparison to gene expression when grown in glucose

89 <sup>d</sup> compare to the growth rate of wild type of 0.203 calculated from T<sub>i</sub>=4 and T<sub>f</sub>=12

90 <sup>e</sup> compare to the maximum OD<sub>600</sub> of 1.06 for wild type

91 <sup>f</sup> confirmed by Halsted *et al.* (Halstead *et al.*, 2000)

92 <sup>g</sup> confirmed by Larsbrink *et al.* (Larsbrink *et al.*, 2014)

93 <sup>h</sup> confirmed by Rixon *et al.* 1992

94 <sup>i</sup> confirmed by Cartmel *et al.* (Cartmell *et al.*, 2008)

95 <sup>j</sup> confirmed by Larsbrink *et al.* (Larsbrink *et al.*, 2011)

96 <sup>k</sup> calculated from T<sub>i</sub>=4 and T<sub>f</sub>=12

97 <sup>l</sup> calculated from T<sub>i</sub>=4 and T<sub>f</sub>=11

98 <sup>m</sup> calculated from T<sub>i</sub>=4 and T<sub>f</sub>=8

99 <sup>n</sup> calculated from T<sub>i</sub>=4 and T<sub>f</sub>=13

100 <sup>o</sup> calculated from T<sub>i</sub>=4 and T<sub>f</sub>=10

101

102  
103

**Table S4. Strains, plasmids, and primers used in this study**

| Strain, plasmid, or primer                                       | Genotype                                                                                                                                                                                                                                          | Source or Reference       |
|------------------------------------------------------------------|---------------------------------------------------------------------------------------------------------------------------------------------------------------------------------------------------------------------------------------------------|---------------------------|
| <b>Strains</b>                                                   |                                                                                                                                                                                                                                                   |                           |
| <i>E. coli</i> DH5 $\alpha$                                      | $\lambda$ Φ80d <i>lacZ</i> ΔM15 Δ( <i>lacZYA-argF</i> )U169<br><i>recA1 endA1 hsdR17</i> (r <sub>k</sub> <sup>-</sup> m <sub>k</sub> <sup>-</sup> ) <i>supE44 thi-1</i><br><i>gyrA relA1</i>                                                      | Laboratory collection     |
| <i>E. coli</i> S17 $\lambda_{pir}$                               | Tpr Smr <i>recA thi pro hsdR hsdM</i> <sup>+</sup> RP4-2-<br>TC::Mu::Km Tn7 $\lambda_{pri}$                                                                                                                                                       | Laboratory collection     |
| <i>E. coli</i> K12                                               |                                                                                                                                                                                                                                                   | Laboratory collection     |
| <i>E. coli</i> strain BL21(DE3)                                  | F <sup>-</sup> <i>ompT gal dcm lon hsdS<sub>B</sub></i> (r <sub>B</sub> <sup>-</sup> m <sub>B</sub> <sup>-</sup> ) $\lambda$ (DE3<br>[ <i>lacI lacUV5-T7p07 ind1 sam7 nin5</i> ])<br>[ <i>malB</i> <sup>+</sup> ] <sub>K-12</sub> ( $\lambda^S$ ) | Merck                     |
| <i>E. coli</i> K12 pBBRMCS-5                                     | Gm <sup>r</sup>                                                                                                                                                                                                                                   | This study                |
| <i>E. coli</i> K12 pBBRMCS-5/ <i>cel3A</i>                       | <i>cel3A</i> <sup>+</sup> ;Gm <sup>r</sup>                                                                                                                                                                                                        | This study                |
| <i>E. coli</i> K12 pBBRMCS-5/ <i>cel3B</i>                       | <i>cel3B</i> <sup>+</sup> ;Gm <sup>r</sup>                                                                                                                                                                                                        | This study                |
| <i>E. coli</i> K12 pBBRMCS-5/ <i>cel3C</i>                       | <i>cel3C</i> <sup>+</sup> ;Gm <sup>r</sup>                                                                                                                                                                                                        | This study                |
| <i>E. coli</i> K12 pBBRMCS-5/ <i>cel3D</i>                       | <i>cel3D</i> <sup>+</sup> ;Gm <sup>r</sup>                                                                                                                                                                                                        | This study                |
| <i>C. japonicus</i> Ueda 107                                     | Wild Type                                                                                                                                                                                                                                         | Laboratory collection     |
| <i>C. japonicus</i> Δ <i>gsp</i>                                 | Ueda 107 Δ <i>gsp</i>                                                                                                                                                                                                                             | (Gardner & Keating, 2010) |
| <i>C. japonicus</i> Δ <i>cel3A</i>                               | Ueda 107 Δ <i>cel3A</i> <sup>a</sup>                                                                                                                                                                                                              | This study                |
| <i>C. japonicus</i> Δ <i>cel3B</i>                               | Ueda 107 Δ <i>cel3B</i> <sup>b</sup>                                                                                                                                                                                                              | This study                |
| <i>C. japonicus</i> Δ <i>cel3C</i>                               | Ueda 107 Δ <i>cel3C</i> <sup>c</sup>                                                                                                                                                                                                              | This study                |
| <i>C. japonicus</i> Δ <i>cel3D</i>                               | Ueda 107 Δ <i>cel3D</i> <sup>d</sup>                                                                                                                                                                                                              | This study                |
| <i>C. japonicus</i> Δ <i>cel3A</i> Δ <i>cel3B</i>                | Ueda 107 Δ <i>cel3A</i> Δ <i>cel3B</i>                                                                                                                                                                                                            | This study                |
| <i>C. japonicus</i> Δ <i>cel3A</i> Δ <i>cel3C</i>                | Ueda 107 Δ <i>cel3A</i> Δ <i>cel3C</i>                                                                                                                                                                                                            | This study                |
| <i>C. japonicus</i> Δ <i>cel3A</i> Δ <i>cel3D</i>                | Ueda 107 Δ <i>cel3A</i> Δ <i>cel3D</i>                                                                                                                                                                                                            | This study                |
| <i>C. japonicus</i> Δ <i>cel3B</i> Δ <i>cel3C</i>                | Ueda 107 Δ <i>cel3B</i> Δ <i>cel3C</i>                                                                                                                                                                                                            | This study                |
| <i>C. japonicus</i> Δ <i>cel3B</i> Δ <i>cel3D</i>                | Ueda 107 Δ <i>cel3B</i> Δ <i>cel3D</i>                                                                                                                                                                                                            | This study                |
| <i>C. japonicus</i> Δ <i>cel3C</i> Δ <i>cel3D</i>                | Ueda 107 Δ <i>cel3C</i> Δ <i>cel3D</i>                                                                                                                                                                                                            | This study                |
| <i>C. japonicus</i> Δ <i>cel3A</i> Δ <i>cel3B</i> Δ <i>cel3C</i> | Ueda 107 Δ <i>cel3A</i> Δ <i>cel3B</i> Δ <i>cel3C</i>                                                                                                                                                                                             | This study                |
| <i>C. japonicus</i> Δ <i>cel3A</i> Δ <i>cel3B</i> Δ <i>cel3D</i> | Ueda 107 Δ <i>cel3A</i> Δ <i>cel3B</i> Δ <i>cel3D</i>                                                                                                                                                                                             | This study                |
| <i>C. japonicus</i> Δ <i>cel3A</i> Δ <i>cel3C</i> Δ <i>cel3D</i> | Ueda 107 Δ <i>cel3A</i> Δ <i>cel3C</i> Δ <i>cel3D</i>                                                                                                                                                                                             | This study                |
| <i>C. japonicus</i> Δ <i>cel3B</i> Δ <i>cel3C</i> Δ <i>cel3D</i> | Ueda 107 Δ <i>cel3B</i> Δ <i>cel3C</i> Δ <i>cel3D</i>                                                                                                                                                                                             | This study                |
| <i>C. japonicus</i> Δ4βG                                         | Ueda 107 Δ <i>cel3A</i> Δ <i>cel3B</i> Δ <i>cel3C</i> Δ <i>cel3D</i>                                                                                                                                                                              | This study                |
| <i>C. japonicus</i> Δ <i>adg97B</i>                              | Ueda 107 Δ <i>adg97B</i> <sup>e</sup>                                                                                                                                                                                                             | This study                |
| <i>C. japonicus</i> <i>aga27A</i> ::pK18 <i>aga27AKO</i>         | Ueda 107 <i>aga27A</i> ::pK18 <i>mobsacB</i> <sup>f</sup>                                                                                                                                                                                         | This study                |
| <i>C. japonicus</i> Δ <i>amy13D</i>                              | Ueda 107 Δ <i>amy13D</i> <sup>g</sup>                                                                                                                                                                                                             | This study                |
| <i>C. japonicus</i> <i>axe2A</i> ::pk18 <i>axe2AKO</i>           | Ueda 107 <i>axe2A</i> ::pk18 <i>mobsacB</i> <sup>h</sup>                                                                                                                                                                                          | This study                |
| <i>C. japonicus</i> Δ <i>bgI35A</i>                              | Ueda 107 Δ <i>bgI35A</i> <sup>i</sup>                                                                                                                                                                                                             | This study                |
| <i>C. japonicus</i> <i>cel5C</i> ::pk18 <i>cel5CKO</i>           | Ueda 107 <i>cel5C</i> ::pk18 <i>mobsacB</i> <sup>j</sup>                                                                                                                                                                                          | This study                |
| <i>C. japonicus</i> <i>cel9B</i> ::pk18 <i>cel9BKO</i>           | Ueda 107 <i>cel9B</i> ::pk18 <i>mobsacB</i> <sup>k</sup>                                                                                                                                                                                          | This study                |
| <i>C. japonicus</i> Δ <i>man26C</i>                              | Ueda 107 Δ <i>man26C</i> <sup>l</sup>                                                                                                                                                                                                             | This study                |
| <i>C. japonicus</i> Δ <i>xyI31A</i>                              | Ueda 107 Δ <i>xyI31A</i> <sup>m</sup>                                                                                                                                                                                                             | This study                |

| Plasmids                        |                                                                                                           |                                |
|---------------------------------|-----------------------------------------------------------------------------------------------------------|--------------------------------|
| pRk2013                         | ColE1 RK2-Mob <sup>+</sup> RK2-Tra <sup>+</sup> ; Km <sup>r</sup>                                         | (Figurski & Helinski, 1979)    |
| pK18 <i>mobsacB</i>             | pMB1 <i>ori mob<sup>+</sup> sacB<sup>+</sup></i> ; Km <sup>r</sup>                                        | (Schafer <i>et al.</i> , 1994) |
| pET28b                          | ColE1 T7promoter: <i>lacO</i> -MCS-T7terminator; Km <sup>r</sup>                                          | Merck                          |
| pK18/ $\Delta$ <i>cel3A</i>     | Contains 500bp upstream and downstream of <i>cel3A</i> cloned into pK18 <i>mobsacB</i> ; Km <sup>r</sup>  | This study                     |
| pK18/ $\Delta$ <i>cel3B</i>     | Contains 500bp upstream and downstream of <i>cel3B</i> cloned into pK18 <i>mobsacB</i> ; Km <sup>r</sup>  | This study                     |
| pK18/ $\Delta$ <i>cel3C</i>     | Contains 500bp upstream and downstream of <i>cel3C</i> cloned into pK18 <i>mobsacB</i> ; Km <sup>r</sup>  | This study                     |
| pK18/ $\Delta$ <i>cel3D</i>     | Contains 500bp upstream and downstream of <i>cel3D</i> cloned into pK18 <i>mobsacB</i> ; Km <sup>r</sup>  | This study                     |
| pK18/ $\Delta$ <i>adg97B</i>    | Contains 500bp upstream and downstream of <i>adg97B</i> cloned into pK18 <i>mobsacB</i> ; Km <sup>r</sup> | This study                     |
| pK18/ <i>aga27AKO</i>           | Contains 500bp internal <i>aga27A</i> cloned into pK18 <i>mobsacB</i> ; Km <sup>r</sup>                   | This study                     |
| pK18 $\Delta$ <i>amy13D</i>     | Contains 500bp upstream and downstream of <i>amy13D</i> cloned into pK18 <i>mobsacB</i> ; Km <sup>r</sup> | This study                     |
| pk18/ <i>axe2AKO</i>            | Contains 500bp internal <i>axe2A</i> cloned into pK18 <i>mobsacB</i> ; Km <sup>r</sup>                    | This study                     |
| pK18/ $\Delta$ <i>bgl35A</i>    | Contains 500bp upstream and downstream of <i>bgl35A</i> cloned into pK18 <i>mobsacB</i> ; Km <sup>r</sup> | This study                     |
| pk18/ <i>cel5CKO</i>            | Contains 500bp internal <i>cel5C</i> cloned into pK18 <i>mobsacB</i> ; Km <sup>r</sup>                    | This study                     |
| pk18/ <i>cel9BKO</i>            | Contains 500bp internal <i>cel9B</i> cloned into pK18 <i>mobsacB</i> ; Km <sup>r</sup>                    | This study                     |
| pK18/ $\Delta$ <i>man26C</i>    | Contains 500bp upstream and downstream of <i>man26C</i> cloned into pK18 <i>mobsacB</i> ; Km <sup>r</sup> | This study                     |
| pK18/ $\Delta$ <i>xy131A</i>    | Contains 500bp upstream and downstream of <i>xy131A</i> cloned into pK18 <i>mobsacB</i> ; Km <sup>r</sup> | This study                     |
| pBBRMCS-5                       | Gm <sup>r</sup>                                                                                           | (Elzer <i>et al.</i> , 1994)   |
| <i>pcel3A</i>                   | Contains <i>cel3A</i> cloned into pBBRMCS-5; Gm <sup>r</sup>                                              | This study                     |
| <i>pcel3B</i>                   | Contains <i>cel3B</i> cloned into pBBRMCS-5; Gm <sup>r</sup>                                              | This study                     |
| <i>pcel3C</i>                   | Contains <i>cel3C</i> cloned into pBBRMCS-5; Gm <sup>r</sup>                                              | This study                     |
| <i>pcel3D</i>                   | Contains <i>cel3D</i> cloned into pBBRMCS-5; Gm <sup>r</sup>                                              | This study                     |
| pET28b: <i>cel3A</i>            | Contains <i>cel3A</i> cloned into pET28b; Kan <sup>r</sup>                                                | This study                     |
| pET28b: <i>cel3B</i>            | Contains <i>cel3B</i> cloned into pET28b; Kan <sup>r</sup>                                                | This study                     |
| Primers                         |                                                                                                           |                                |
| $\Delta$ <i>cel3A</i> CONF (5') | GAT TTA CCA GGGTGTTT                                                                                      | This study                     |
| $\Delta$ <i>cel3A</i> CONF (3') | TTCGCTATTTGAAAGGTA                                                                                        | This study                     |

|                                  |                                                |            |
|----------------------------------|------------------------------------------------|------------|
| <i>cel3A</i> INT (5')            | GGTGGTGGATCCCTGCCGATACTGT                      | This study |
| <i>cel3A</i> INT (3')            | GGTGGTTCTAGAGCCAATAAAGTGCT                     | This study |
| $\Delta$ <i>cel3B</i> CONF (5')  | TGATCATAGTGGCCAT                               | This study |
| $\Delta$ <i>cel3B</i> CONF (3')  | TACTCATAGCAGCCG                                | This study |
| <i>cel3B</i> INT (5')            | GGTGGTGGATCCATGGATGAGAGCGA                     | This study |
| <i>cel3B</i> INT (3')            | GGTGGTTCTAGACAGTCAACAAATAAC                    | This study |
| $\Delta$ <i>cel3C</i> CONF (5')  | CAGTCGCCCTTATGT                                | This study |
| $\Delta$ <i>cel3C</i> CONF (3')  | ATTCACAATTCCTGGTGT                             | This study |
| <i>cel3C</i> INT (5')            | GGTGGTGAATTCCTGAAACATCCGGC                     | This study |
| <i>cel3C</i> INT (3')            | GGTGGTTCTAGAGTTTAGCCGTGGCA                     | This study |
| $\Delta$ <i>cel3D</i> CONF (5')  | TGGGTAATACATTGCTTG                             | This study |
| $\Delta$ <i>cel3D</i> CONF (3')  | TGCCAGGTATGTGGA                                | This study |
| <i>cel3D</i> INT (5')            | GGTGGTGAATTCGCTGACTGAGGTAT                     | This study |
| <i>cel3D</i> INT (3')            | GGTGGTTCTAGACAACAACAGCAACA                     | This study |
| <i>cel3A</i> EXP (5')            | GCGCGCCATATGTGTGATTCCC GCGCTC<br>CC            | This study |
| <i>cel3A</i> EXP (3')            | GCGCGGAGCTCGGGGCAGGCGACGTC<br>TTT              | This study |
| <i>cel3B</i> EXP (5')            | GCGCGCCATATGCTGTGGCCAAAAGTCA<br>CC             | This study |
| <i>cel3B</i> EXP (3')            | GCGCGGAGCTCACCAACAACACCAAT<br>GT               | This study |
| $\Delta$ <i>adg97B</i> CONF (5') | ATGATGGTGGCATTG                                | This study |
| $\Delta$ <i>adg97B</i> CONF (3') | TAATCCTTGACCGCAT                               | This study |
| <i>adg97B</i> UP (5')            | ACAGCTATGACATGATTACGTCCGAAGT<br>TTTATTAAGCAGC  | This study |
| <i>adg97B</i> UP (3')            | ATTGGCAATTACATCATATTCCCCTGACA<br>TATCTCGGT     | This study |
| <i>adg97B</i> DOWN (5')          | GAATATGATGTAATTGCCAATACCCAAGC<br>CGTTG         | This study |
| <i>adg97B</i> DOWN (3')          | TGCATGCCTGCAGGTCGACTCTGTAATC<br>CTTGACCGCATAG  | This study |
| <i>adg97B</i> INT (5')           | TAT GCG TCT ATG ACA CTG                        | This study |
| <i>adg97B</i> INT (3')           | TCA ATT CGC TTG GCT TTG                        | This study |
| <i>aga27A</i> KO (5')            | GGTGGTGAATTCACATCCGGTATGAA                     | This study |
| <i>aga27A</i> KO (3')            | GGTGGTTCTAGATGTTTGGTCGAGGATG                   | This study |
| <i>aga27A</i> CONF (5')          | GGTGGTGAATTCGTACCCAACATCACC                    | This study |
| <i>aga27A</i> CONF (3')          | GTGGTTCTAGATAAAAAAACGCCGC                      | This study |
| $\Delta$ <i>amy13D</i> CONF (5') | TCAAATGGCCGCTGA                                | This study |
| $\Delta$ <i>amy13D</i> CONF (3') | TGACAGTCAGGAATGC                               | This study |
| <i>amy13D</i> UP (5')            | GCTATGACATGATTACGAATTCTTCAAAT<br>GGCCGCTGACCAA | This study |
| <i>amy13D</i> UP (3')            | AGCCTTGACATCAAATCCCCCATTGTTGA<br>CCGTTTTG      | This study |
| <i>amy13D</i> DOWN (5')          | GATTTGATCTGAAGGCTTTGGTATTGATG<br>ACTGAAC       | This study |
| <i>amy13D</i> DOWN (3')          | GCCTGCAGGTCGACTCTAGACCCCTTTG<br>ACAGTCACGAATGC | This study |
| <i>amy13D</i> INT (5')           | GGTGGTGGATCCGATCTTGCGACCGATC                   | This study |
| <i>amy13D</i> INT (3')           | GGTGGTTCTAGACGGAAAGGATCAACAC                   | This study |

|                                  |                              |                           |
|----------------------------------|------------------------------|---------------------------|
| <i>axe2A</i> KO (5')             | GGTGGTAAGCTTTGGTCGGGATTGTTC  | This study                |
| <i>axe2A</i> KO (3')             | GGTGGTTCTAGATGAAACCGCCTTTAA  | This study                |
| <i>axe2A</i> CONF (5')           | GGTGGTAAGCTTATTGCGGATATGCAG  | This study                |
| <i>axe2A</i> CONF (3')           | GGTGGTTCTAGACAAAAGGCCTGCAA   | This study                |
| $\Delta$ <i>bg135A</i> CONF (5') | CGTAGCAAGTACCTGAT            | This study                |
| $\Delta$ <i>bg135A</i> CONF (3') | GTACCACGGTTTTCCCTC           | This study                |
| <i>bg135A</i> INT (5')           | GGTGGTTCTAGATTGCCACACCGATA   | This study                |
| <i>bg135A</i> INT (3')           | GGTGGTGGATCCCAATGACGTTCAAAT  | This study                |
| <i>cel5C</i> KO (5')             | GGTGGTGAATTCAGCGTGGCGTGAA    | This study                |
| <i>cel5C</i> KO (3')             | GGTGGTTCTAGAGATATGCGCCCTT    | This study                |
| <i>cel5C</i> CONF (5')           | GGTGGTGAATTCAGCGGCTGTTATC    | This study                |
| <i>cel5C</i> CONF (3')           | GGTGGTTCTAGAGTTCCAGGCAATGC   | This study                |
| <i>cel9B</i> KO (5')             | GGTGGTGAATTCGCAGGTTGTGGCA    | This study                |
| <i>cel9B</i> KO (3')             | GGTGGTTCTAGAGTTGTAGTCACCCG   | This study                |
| <i>cel9B</i> CONF (5')           | GGTGGTGAATTCGGGTCCGATAAG     | This study                |
| <i>cel9B</i> CONF (3')           | GGTGGTTCTAGACATACCCTGCCGTA   | This study                |
| $\Delta$ <i>man26C</i> CONF (5') | GTGGCAAATACGCCCA             | This study                |
| $\Delta$ <i>man26C</i> CONF (3') | CAGCGACTTGTCCAG              | This study                |
| <i>man26C</i> INT (5')           | GGTGGTTCTAGAACCAGTCGCCGTTAT  | This study                |
| <i>man26C</i> INT (3')           | GGTGGTGGATCCCTCCCCTGATTGATAC | This study                |
| $\Delta$ <i>xy131A</i> CONF (5') | TGTAGCTGAGCCATTG             | This study                |
| $\Delta$ <i>xy131A</i> CONF (3') | TACCAGCCCTACCTG              | This study                |
| <i>xy131A</i> INT (5')           | GGTGGTGAATTCTGAGCTTCCGTGATG  | This study                |
| <i>xy131A</i> INT (3')           | GGTGGTTCTAGAATTTCCGGTGGTAGCT | This study                |
| P#4 (GENERAL KO PRIMER) (3')     | CAGGCGCTCGTAGAC              | (Gardner & Keating, 2010) |
| P#5 (GENERAL KO PRIMER) (5')     | GTGTGGAATTGTGAGCG            | (Gardner & Keating, 2010) |

- 104 <sup>a</sup> BioCyc accession number CJA\_0204  
105 <sup>b</sup> BioCyc accession number CJA\_1497  
106 <sup>c</sup> BioCyc accession number CJA\_0223  
107 <sup>d</sup> BioCyc accession number CJA\_1140  
108 <sup>e</sup> BioCyc accession number CJA\_0736  
109 <sup>f</sup> BioCyc accession number CJA\_0246  
110 <sup>g</sup> BioCyc accession number CJA\_0737  
111 <sup>h</sup> BioCyc accession number CJA\_3103  
112 <sup>i</sup> BioCyc accession number CJA\_2707  
113 <sup>j</sup> BioCyc accession number CJA\_3369  
114 <sup>k</sup> BioCyc accession number CJA\_1633  
115 <sup>l</sup> BioCyc accession number CJA\_0236  
116 <sup>m</sup> BioCyc accession number CJA\_2706  
117



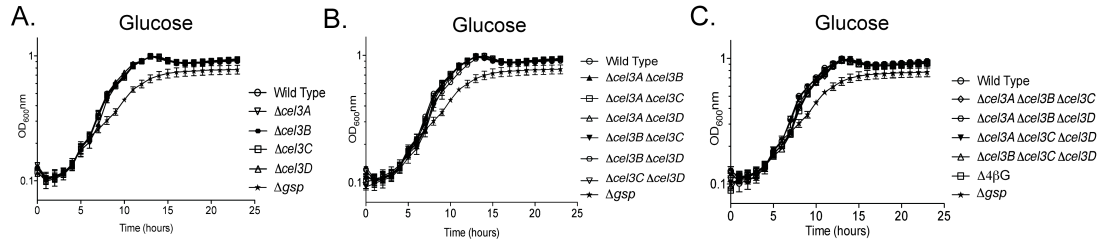

118  
119  
120  
121  
122  
123  
124  
125

**Fig. S1. All  $\beta$ -glucosidase mutants can grow as wild type on glucose.** Single (A), double (B), triple, and quadruple (C) deletions were grown with (0.25%) glucose as the sole carbon source. Experiments were performed in biological triplicate and error bars represent standard deviation. These growth experiments were performed simultaneously, but are separated into multiple panels for clarity. As a consequence, the control strains (wild type and  $\Delta gsp$ ) are repeated in each panel.

126

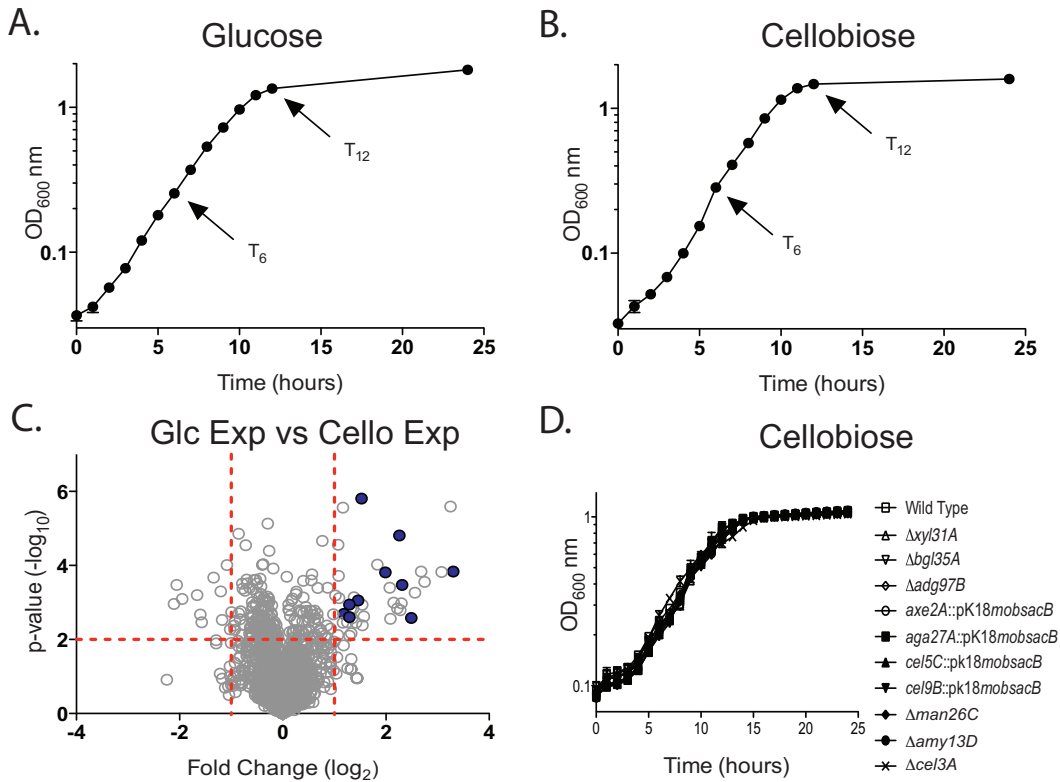

127

128

129

130

131

132

133

134

135

136

137

138

139

140

141

142

**Fig. S2. *C. japonicus* CAZyme genes identified as up-regulated during exponential growth on cellobiose when compared to growth on glucose displayed no growth defects on cellobiose when deleted individually.** Samples for RNAseq were taken during growth on 0.5% glucose (A) and 0.25% cellobiose (B) during exponential growth (Exp) and stationary phase (Sta) as indicated by the arrows. Genes up-regulated during exponential growth on cellobiose compared to exponential growth on glucose were identified using a volcano plot (C). The fold change (log<sub>2</sub> scale) is plotted on the x-axis and the p-value (-log<sub>10</sub> scale) is plotted on the y-axis. The red dashed lines indicate the significance cut-off values. Each gray circle represents a gene, and the blue-filled circles represent an up-regulated CAZyme gene. Single mutants were made of each of the up-regulated CAZyme genes and growth analysis was performed on 0.5% cellobiose (D). These growth experiments were performed in biological triplicate and error bars represent standard deviation, but in most cases are too small to be observed.

143

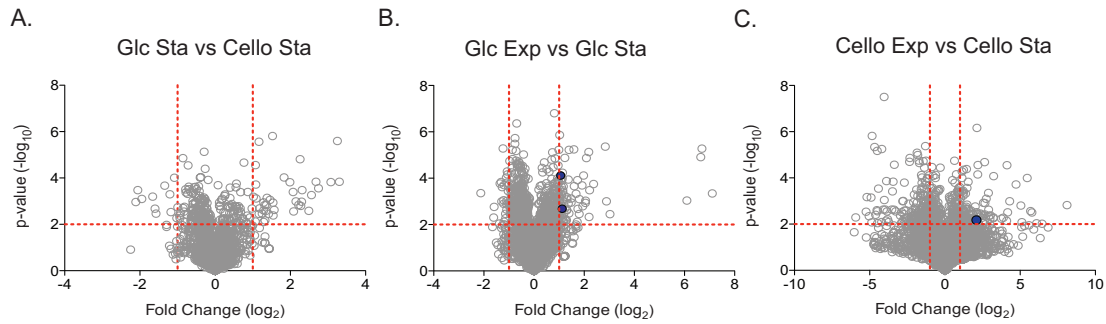

144

145

146

147

148

149

150

151

152

153

154

155

156

**Fig. S3. Control RNAseq experiments identify CAZyme genes regulated by growth phase.** RNAseq expression data from growth during stationary phase (Sta) on (0.5%) glucose was compared to stationary phase on (0.25%) cellobiose (A). Expression data from exponential growth on (0.5%) glucose was compared to stationary phase on (0.5%) glucose. Both *amy13J* and *gly57A* genes were significantly up-regulated, and represented as blue closed circles (B). Expression data from exponential phase during growth on (0.25%) cellobiose was compared to stationary phase on (0.25%) cellobiose. The up-regulated CAZyme gene, as indicated by a blue circle, was *cel3B* (C). The fold change (log<sub>2</sub> scale) is plotted on the x-axis and the p-value (-log<sub>10</sub> scale) is plotted on the y-axis. The red dashed lines indicate the significance cut-off values. Each gray circle represents a single *C. japonicus* gene.

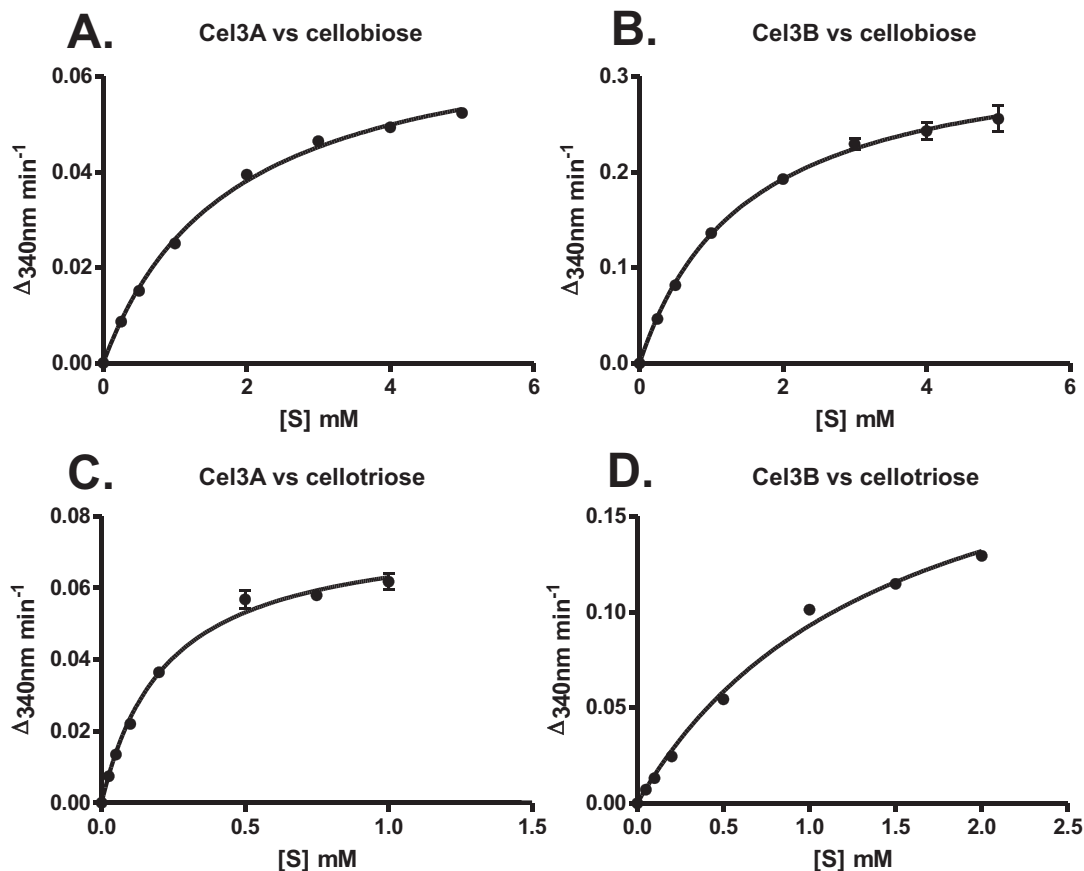

157  
158  
159  
160  
161  
162  
163  
164  
165  
166  
167  
168  
169

**Fig. S4. Example of kinetic graphs for Cel3A and Cel3B.** The enzymes were produced in recombinant form from *E. coli* and purified by electrophoretic homogeneity by IMAC. The assays were carried out using the Megazyme International Glucose Detection Kit. Assays were carried in 20 mM sodium phosphate pH 7.5 at 37 °C. The concentrations of enzyme used in the assays were as follows: Cel3A was at 50 nM and 10 nM against cellobiose and cellotriose, respectively; Cel3B was at 5 nM and 50 nM against cellobiose and cellotriose, respectively. The y-axes report the mM concentration of glucose produced per min. The assays used three technical replicates. Error bars represent the standard error of the mean, though in some cases are too small to be seen on the graph. Additional details on the kinetic experiments can be found in Table 2.

170 **REFERENCES**

- 171
- 172 Cartmell, A., E. Topakas, V.M. Ducros, M.D. Suits, G.J. Davies & H.J. Gilbert, (2008)
- 173 The *Cellvibrio japonicus* mannanase CjMan26C displays a unique exo-mode of
- 174 action that is conferred by subtle changes to the distal region of the active site.
- 175 *Journal of Biological Chemistry* **283**: 34403-34413.
- 176 DeBoy, R.T., E.F. Mongodin, D.E. Fouts, L.E. Tailford, H. Khouri, J.B. Emerson, Y.
- 177 Mohamoud, K. Watkins, B. Henrissat, H.J. Gilbert & K.E. Nelson, (2008) Insights
- 178 into plant cell wall degradation from the genome sequence of the soil bacterium
- 179 *Cellvibrio japonicus*. *Journal of Bacteriology* **190**: 5455-5463.
- 180 Elzer, P.H., M.E. Kovach, R.W. Phillips, G.T. Robertson, K.M. Peterson & R.M. Roop,
- 181 (1994) *In vivo* and *in vitro* stability of the broad-host-range cloning vector
- 182 pBBR1MCS in six *Brucella* Species. *Plasmid* **33**: 51-57.
- 183 Figurski, D.H. & D.R. Helinski, (1979) Replication of an origin-containing derivative of
- 184 plasmid RK2 dependent on a plasmid function provided in *trans*. *Proceeding of*
- 185 *the National Academy of Sciences* **76**: 1684-1652.
- 186 Gardner, J.G. & D.H. Keating, (2010) Requirement of the type II secretion system for
- 187 utilization of cellulosic substrates by *Cellvibrio japonicus*. *Applied and*
- 188 *Environmental Microbiology* **76**: 5079-5087.
- 189 Halstead, J.R., M.P. Fransen, R.Y. Eberhart, A.J. Park, H.J. Gilbert & G.P. Hazlewood,
- 190 (2000) alpha-Galactosidase A from *Pseudomonas fluorescens* subsp. *cellulosa*:
- 191 cloning, high level expression and its role in galactomannan hydrolysis. *FEMS*
- 192 *Microbiology Letters* **192**: 197-203.
- 193 Larsbrink, J., A. Izumi, F.M. Ibatullin, A. Nakhai, H.J. Gilbert, G.J. Davies & H. Brumer,
- 194 (2011) Structural and enzymatic characterization of a glycoside hydrolase family
- 195 31 alpha-xylosidase from *Cellvibrio japonicus* involved in xyloglucan
- 196 saccharification. *Biochemical Journal* **436**: 567-580.
- 197 Larsbrink, J., A.J. Thompson, M. Lundqvist, J.G. Gardner, G.J. Davies & H. Brumer,
- 198 (2014) A complex gene locus enables xyloglucan utilization in the model
- 199 saprophyte *Cellvibrio japonicus*. *Molecular Microbiology* **94**: 418-433.
- 200 Schafer, A., A. Tauch, W. Jager, J. Kalinowski, G. Theibach & A. Puhler, (1994) Small
- 201 mobilization multi-purpose cloning vectors derived from the *Escherichia coli*
- 202 plasmids pK18 and pK19: selection of defined deletions in the chromosome of
- 203 *Corynebacterium glutamicum*. *Gene* **145**: 69-73.
- 204
- 205
